# Supplementary material for: Aerosol activation characteristics and prediction at the central European ACTRIS research station of Melpitz, Germany
Source: Copernicus journal article supplement (doi:10.5194/acp-22-15943-2022), 2022-12-19
Supplement: Supplementary file 1 [file acp-22-15943-2022-supplement.pdf]

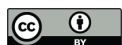

*Supplement of*

## **Aerosol activation characteristics and prediction at the central European ACTRIS research station of Melpitz, Germany**

**Yuan Wang et al.**

*Correspondence to:* Yuan Wang (wang\_yuan@lzu.edu.cn) and Silvia Henning (henning@tropos.de)

The copyright of individual parts of the supplement might differ from the article licence.

**Text S1. Relationship between aerosol hygroscopicity factor calculated from the chemical composition and the individual composition groups.**

For understanding the relationship between aerosol hygroscopicity factor calculated from the chemical composition ( $\kappa_{\text{chem}}$ ) and the individual composition groups, it is important to realize that these groups do not act in the same way in Eq 3. The influence of organics is direct. As shown in Table 1, the hygroscopicity of organics ( $\kappa_{\text{org}}$ ) is smaller than that of inorganics ( $\kappa_{\text{inorg}}$ ). Thus, higher mass fraction of organics ( $f_{\text{org}}$ ) means lower  $\kappa_{\text{chem}}$ , as shown in Figure S5a. But with  $\text{SO}_4$ ,  $\text{NH}_4$ ,  $\text{NO}_3$  it is more complicated because they are coupled through the ion balance. As shown in Figure 5c, the absolute amount of  $\text{SO}_4$  and  $\text{NH}_4$  seems stable, but the  $\text{NO}_3$  amount changes a lot between the seasons. The presence of  $\text{NO}_3$  shifts the salts from mostly  $(\text{NH}_4)_2\text{SO}_4$  towards  $\text{NH}_4\text{NO}_3$  and  $\text{NH}_4\text{HSO}_4$  or even  $\text{H}_2\text{SO}_4$ . Hygroscopicity factors ( $\kappa$ ) are very similar between  $(\text{NH}_4)_2\text{SO}_4$ ,  $\text{NH}_4\text{HSO}_4$ , and  $\text{NH}_4\text{NO}_3$ , but  $\kappa$  of  $\text{H}_2\text{SO}_4$  is much higher. Thus, an increase in  $\text{NO}_3$  can have a dual impact on  $\kappa$  for this data set, causing the positive correlation between mass fraction of nitrate and  $\kappa_{\text{chem}}$  in Figure S5b. The increase in  $\text{NO}_3$  adds a higher proportion of salt and increases the  $\kappa$  of  $\text{SO}_4$ . So, if mass fraction of  $\text{SO}_4$  ( $f_{\text{sulfate}}$ ) decreases because more organics is present,  $\kappa$  decreases. If  $f_{\text{sulfate}}$  decreases because more  $\text{NO}_3$  is present,  $\kappa$  increase. As these two trends are opposite, the correlation of  $f_{\text{sulfate}}$  and  $\kappa_{\text{chem}}$  will be poor.

## **Text S2. Yearly variations of CCN activation characteristics.**

Yearly trends of CCN activation properties are investigated. The CCN number concentration ( $N_{CCN}$ ) and hygroscopicity factor calculated from monodisperse CCN measurements ( $\kappa_{CCN}$ ) measured at supersaturation ( $SS$ ) of 0.1% and 0.7% are chosen to represent the CCN activation characteristics. The results are shown in Figure S7. The yearly trends in  $N_{CCN}$  and  $\kappa_{CCN}$  are not significant (without significant increase or decrease trends) during the measurements from August 2012 to October 2016. However, it is interesting to see that the  $N_{CCN}$  measured in 2015 was significantly lower than it measured in other four years. One of the reasons could be that the CCN measurements in 2015 concentrated in summer and autumn, lacking measurements in the spring and winter months (Figure S1). As shown in Figure 3b,  $N_{CCN}$  measured at summer and autumn are lower than those measured in spring and winter due to its seasonal trend, causing the lowest median  $N_{CCN}$  values in 2015. Thus, the CCN measurements in 2015 may not be representative of the CCN characteristics of the whole year. Similarly, the 2012 measurements may not be representative of year-round CCN characteristics because of the lacking spring and summer measurements. Additionally, it is also hard to see the yearly trends of CCN activation characteristics using the only 4-year data. In order to investigate the yearly trends of CCN activation characteristics, longer-term measurements are required.

**Text S3. Method for evaluating the impact of  $N_{CCN}$  overestimation on cloud radiative forcing and autoconversion process**

Cloud optical thickness ( $\tau$ ) can be expressed by (Stephens, 1984)

$$\tau \approx \frac{3}{2} W r_e^{-1}, \quad (1)$$

where  $W$  is the liquid water path,  $r_e$  is the effective radius of cloud droplets. Meanwhile  $r_e$  is proportional to the volume weighted mean radius of cloud droplets ( $r_v$ ) (Bower and Choularton, 1992) and can be expressed by

$$r_e = \beta \left( \frac{3q}{4\pi\rho_w N_c} \right)^{1/3} = \beta r_v, \quad (2)$$

where  $\beta$  is the scaling factor,  $q$  is the cloud liquid water content,  $\rho_w$  is the density of water, and  $N_c$  is the number concentration of cloud droplet. Here, to focus on the effect of  $N_c$  on  $r_e$ ,  $\beta$  is specified as a fixed parameter, i.e., ignoring the dispersion effect, as assumed in many climate models (Quaas et al., 2004).

According to Liu et al. (2004, 2005), parameterization of the autoconversion process can be expressed by

$$P = TA \times P_0, \quad (3)$$

where  $P$  is the autoconversion rate,  $P_0$  is the rate function describing the conversion rate after the onset of the autoconversion process, and  $TA$  is a function describing the threshold behavior of the autoconversion process. Meanwhile,  $TA$  can be expressed by

$$TA = \left[ \frac{\int_{r_c}^{\infty} r^6 n(r) dr}{\int_0^{\infty} r^6 n(r) dr} \right] \left[ \frac{\int_{r_c}^{\infty} r^3 n(r) dr}{\int_0^{\infty} r^3 n(r) dr} \right], \quad (4)$$

where  $r$  is the droplet radius,  $n(r)$  is the cloud droplet size distribution, and  $r_c$  is the critical radius of autoconversion process. The  $TA$  ranges from zero to one, with a larger  $TA$  indicating a greater probability that the collision process occurs in clouds. Liu et al. (2006) derived the analytical expression of  $r_c$  as follows:

$$r_c \approx 4.09 \times 10^{-4} \beta_{con}^{1/6} \frac{N_c^{1/6}}{q^{1/3}}, \quad (5)$$

where  $\beta_{con} = 1.15 \times 10^{23} \text{ s}^{-1}$  is an empirical constant.

Essentially, an overestimation of  $N_{CCN}$  leads to overestimate  $N_c$  in models. From the 3rd and 4th scheme to 5th scheme, the slope of the linear fitting decreases 0.1 on average, meaning that the ~10% overestimation of  $N_{CCN}$  and  $N_c$  is reduced. According to equations 1 and 2, it can reduce 3.1% underestimation of  $r_e$  when assuming the constant  $q$  and  $\beta$ , thereby reducing 3.2% overestimation of  $\tau$ . When assuming the global average cloud shortwave cooling effect is  $40 \text{ Wm}^{-2}$  (Lee et al., 1997), the corresponding difference is  $1.28 \text{ Wm}^{-2}$ , which amounts to 32% of the direct radiative forcing from a doubling  $\text{CO}_2$  (about  $4 \text{ Wm}^{-2}$ ). Additionally, according to the equations 4 and 5, it can reduce the overestimation of  $r_c$  thus the underestimation of  $TA$ , indicating that the underestimation of the strength of autoconversion process can be reduced.

**Text S4.  $N_{CCN}$  predictions using the seasonally mean value of  $\kappa$  over  $D_p$  of 100 to 200 nm**

The main size dependence of  $\kappa$  occurs at  $D_p$  of ~40 to 100 nm as shown in Figure 6a, which would be for  $SS$  larger than 0.2%. At  $D_p$  of 100 to 200 nm corresponding to  $SS$  less than 0.2%,  $\kappa$  almost stays constant. The mean value of  $\kappa$  at  $D_p$  of 100 to 200 nm is close to 0.3 for spring and winter, and that's where deviations in Figure S7c are small. However, the mean value of  $\kappa$  at  $D_p$  of 100 to 200 nm overestimates the  $\kappa$  for  $SS$  larger than 0.2% at each season. We further compare the  $N_{CCN}$  predictions between using the seasonally mean value of  $\kappa$  over  $D_p$  of 100 to 200 nm and the  $\kappa$  -  $D_p$  power-law fit. As shown in Figure S8, at  $SS = 0.1$  and 0.2%, the seasonally mean  $\kappa$  value over  $D_p$  of 100 to 200 nm and  $\kappa$  -  $D_p$  power-law fit both predict the  $N_{CCN}$  well at each season, while the mean  $\kappa$  value over  $D_p$  of 100 to 200 nm leads to a significant overestimation of  $N_{CCN}$  within 10% on average at  $SS = 0.3, 0.5$ , and 0.7%. Therefore, to predict the  $N_{CCN}$  at a relatively low  $SS$  of less than 0.2% (e.g., in fog and shallow stratiform cloud), the mean  $\kappa$  value over  $D_p$  of 100 to 200 nm also works well.

## Reference

- Bower, K. N., and Choullarton, T. W.: A parameterization of the effective radius of ice-free clouds for use in global climate models, *Atmos. Res.*, 27, 305–339, 1992.
- Eichler, H., Cheng, Y. F., Birmili, W., Nowak, A., Wiedensohler, A., Brüggemann, E., Gnauk, T., Herrmann, H., Althausen, D., Ansmann, A., Engelmann, R., Tesche, M., Wendisch, M., Zhang, Y. H., Hu, M., Liu, S., and Zeng, L. M.: Hygroscopic properties and extinction of aerosol particles at ambient relative humidity in South-Eastern China, *Atmos. Environ.*, 42, 6321–6334, <https://doi.org/10.1016/j.atmosenv.2008.05.007>, 2008.
- Fors, E. O., Swietlicki, E., Svenningsson, B., Kristensson, A., Frank, G. P., and Sporre, M.: Hygroscopic properties of the ambient aerosol in southern Sweden – a two year study, *Atmos. Chem. Phys.*, 11, 8343–8361, <https://doi.org/10.5194/acp-11-8343-2011>, 2011.
- Lee, W., Iacobellis, S. F., & Somerville, R. C. J.: Cloud Radiation Forcings and Feedbacks: General Circulation Model Tests and Observational Validation, *Journal of Climate*, 10(10), 2479–2496, 1997.
- Liu, Y., Daum, P. H., and McGraw, R.: An analytical expression for predicting the critical radius in the autoconversion parameterization, *Geophys. Res. Lett.*, 31(6), L06121, 2004.
- Liu, Y., Daum, P. H., and McGraw, R.: Size truncation effect, threshold behavior, and a new type of autoconversion parameterization, *Geophys. Res. Lett.*, 32(11), L11811, 2005.
- Liu, Y., Daum, P. H., McGraw, R., and Miller, M.: Generalized threshold function accounting for effect of relative dispersion on threshold behavior of autoconversion process, *Geophys. Res. Lett.*, 33(11), L11804, 2006.
- Quaas, J., Boucher, O., and Breon, F. M.: Aerosol indirect effects in POLDER satellite data and the Laboratoire de Meteorologie Dynamique Zoom (LMDZ) general circulation model, *J. Geophys. Res.*, 109, 2004.

138 Stephens, G. L.: The parameterization of radiation for numerical weather predication  
139 and climate models, Mon. Weather Rev., 112, 826–867, 1984.  
140



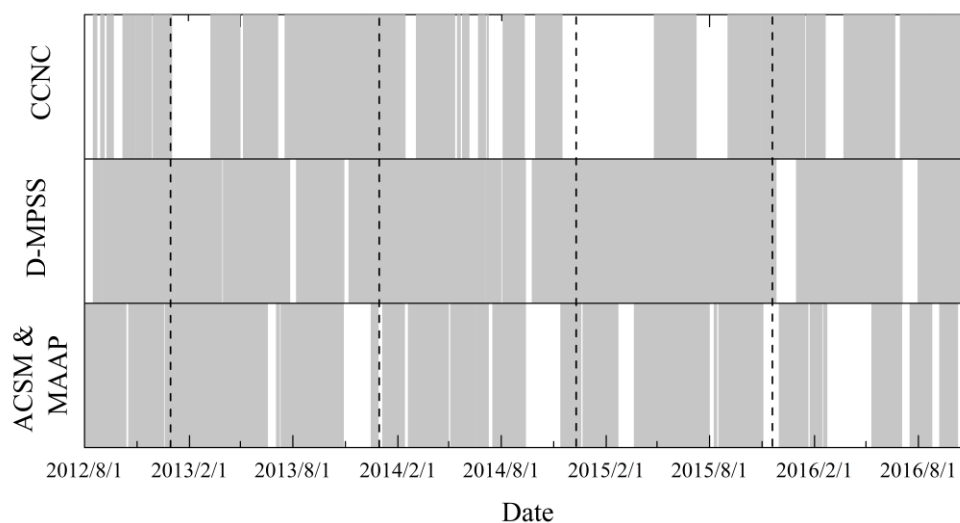

Figure S1. Coverage of the effective data represented by the gray columns during the long-term experiment at Melpitz. CCNC — cloud condensation nuclei counter, D-MPSS — Dual-mobility particle size spectrometer, ACSM — aerosol chemical species monitor, MAAP — multi-angle absorption photometer.

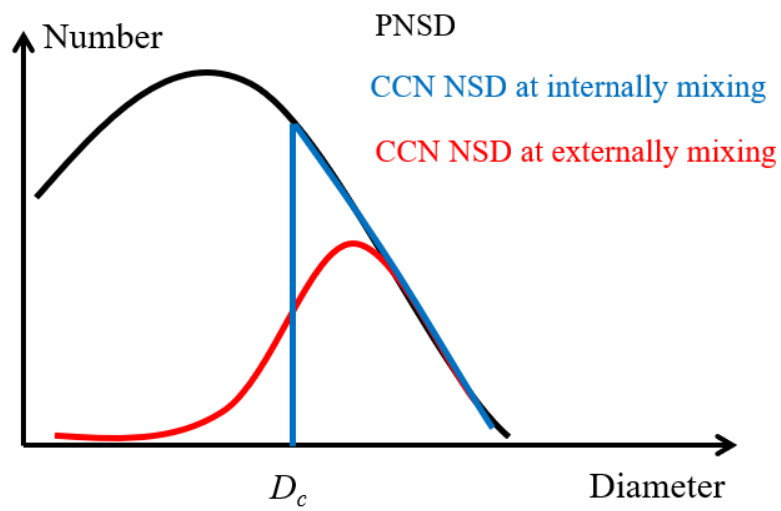

147

148 Figure S2. Schematic diagram for the relationship among the particle number size  
 149 distribution (PNSD), CCN number size distribution (CCN NSD) at internally mixing,  
 150 and the CCN NSD at externally mixing.

151

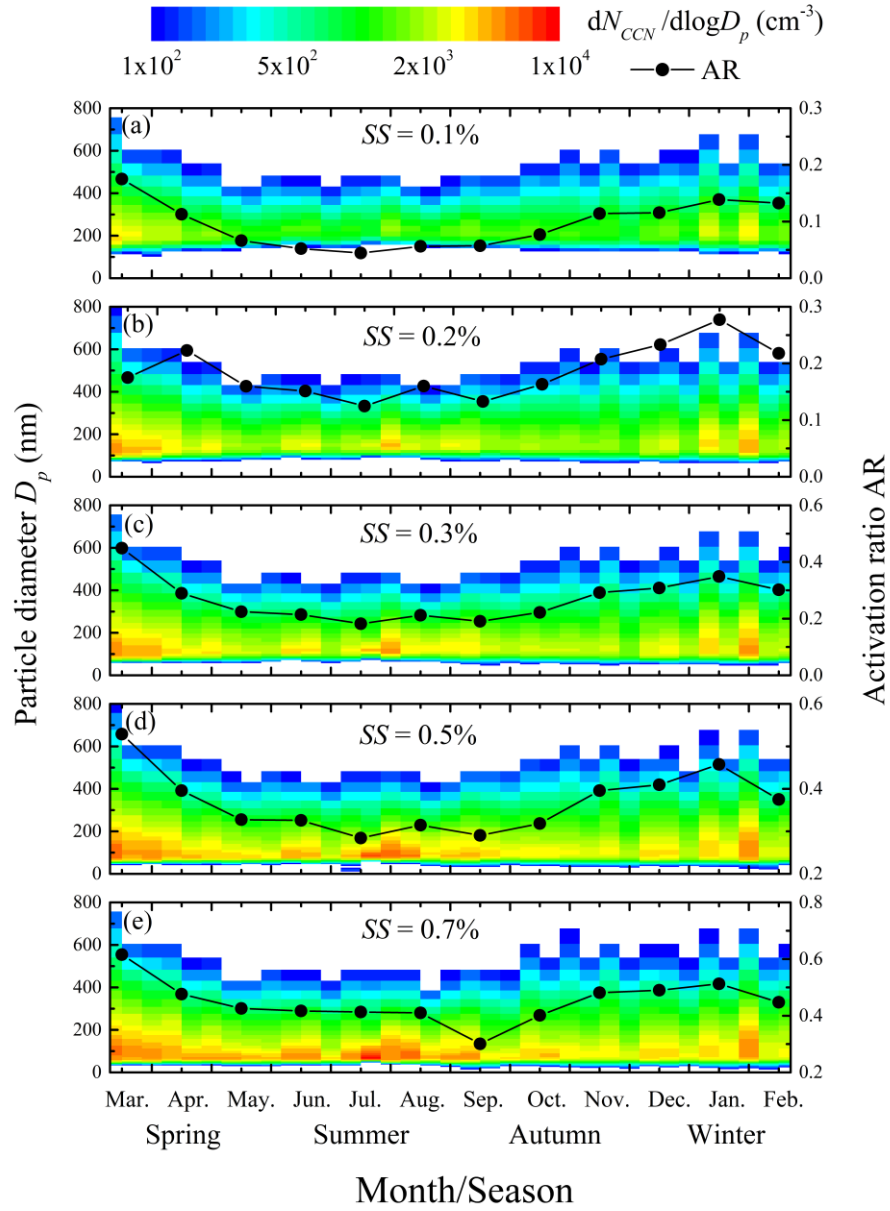

Figure S3. Monthly variations of CCN number size distributions and activation ratios (AR) at five different supersaturation (SS) conditions. The CCN number size distribution was the result of using an average of every ten days. The black dot presents the median AR at each month.

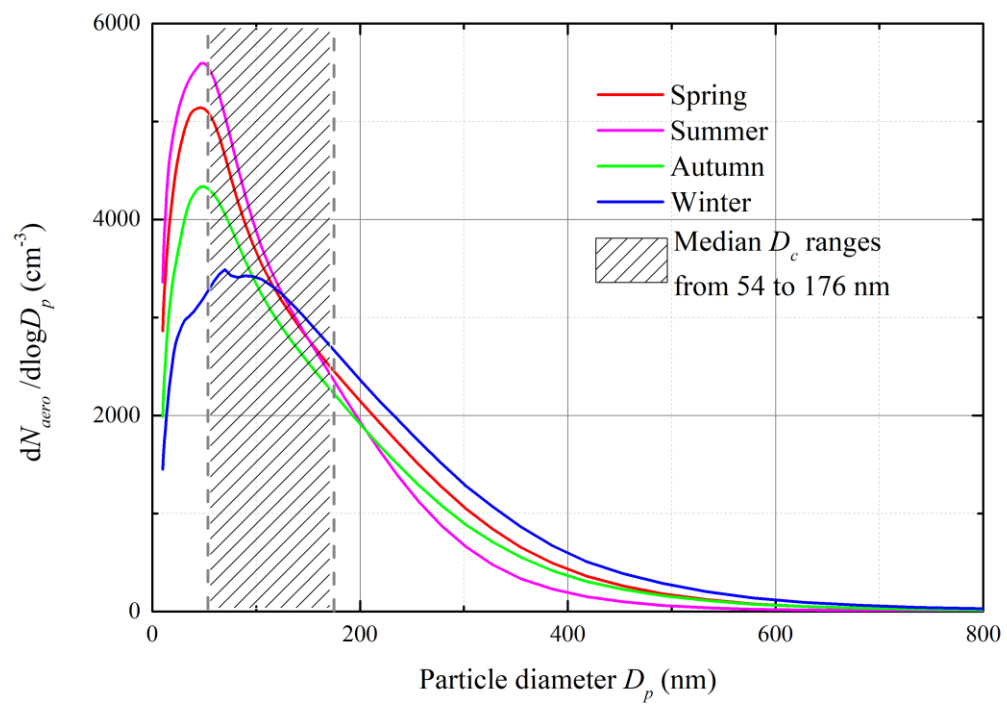

156

157 Figure S4. Mean particle number size distribution at each season.

158

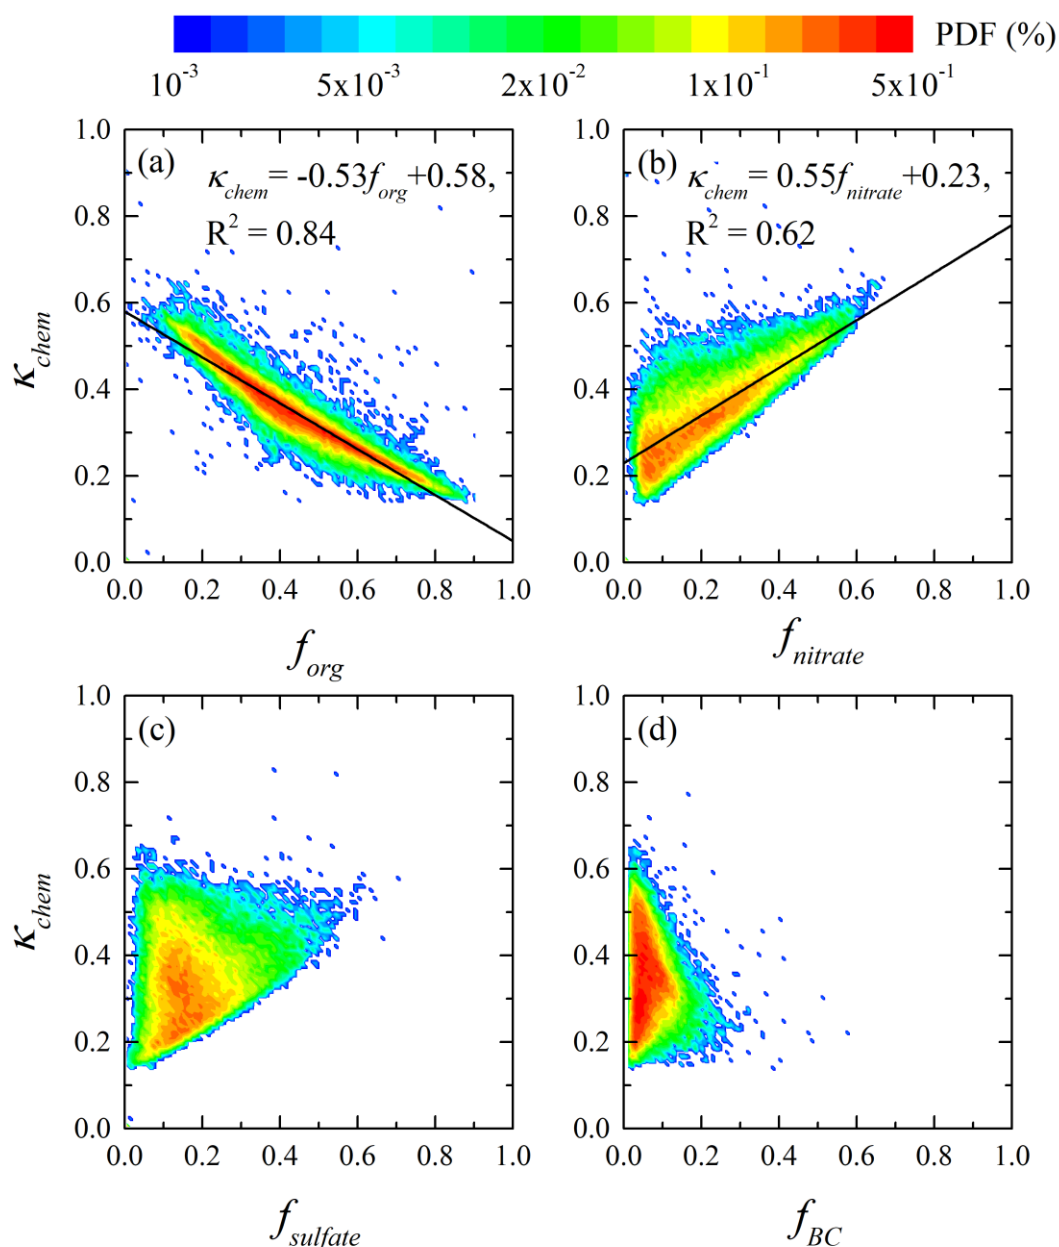

Figure S5. Relationships between (a) aerosol hygroscopicity factor calculated from the chemical composition ( $\kappa_{chem}$ ) and mass fraction of organics ( $f_{org}$ ) in submicron aerosol, (b)  $\kappa_{chem}$  vs. mass fraction of nitrate ( $f_{nitrate}$ ), (c)  $\kappa_{chem}$  vs. mass fraction of nitrate ( $f_{sulfate}$ ), and (d)  $\kappa_{chem}$  vs. mass fraction of black carbon ( $f_{BC}$ ). Color bar represents the probability density function (PDF). Black lines are linear fit lines.

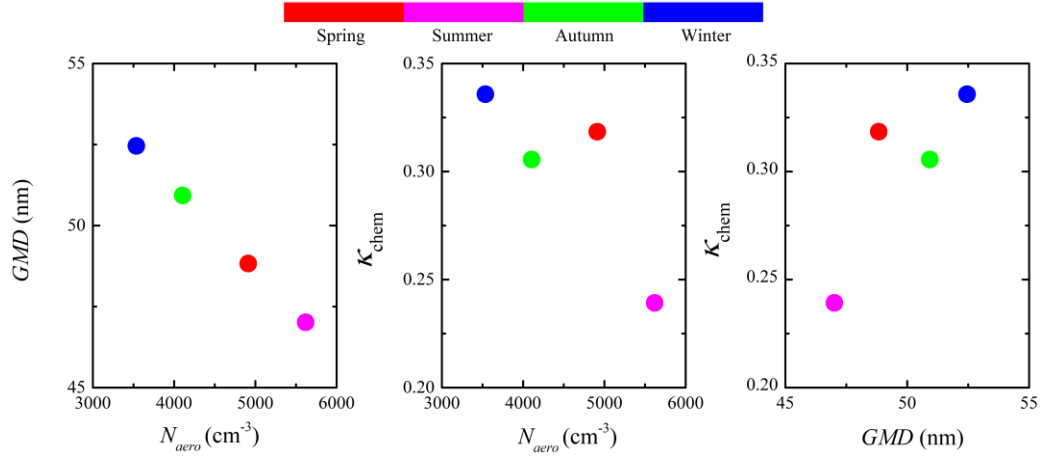

Figure S6. Relationships among seasonal median values of aerosol number concentration with diameter ranging 10 to 800 nm ( $N_{aero}$ ), geometric mean diameter of aerosol particles ( $GMD$ ), and particle hygroscopicity parameter calculated from the chemical compositions ( $\kappa_{chem}$ ). The dots represent the median values at each season.

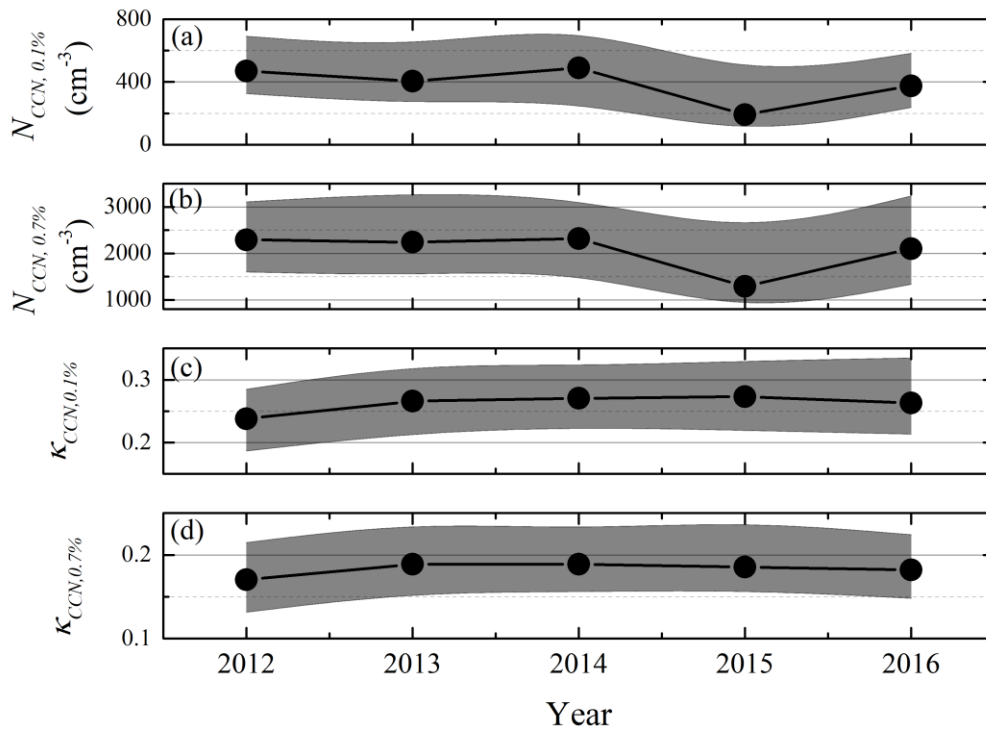

Figure S7. Yearly variations of (a) CCN number concentration ( $N_{CCN}$ ) at supersaturation ( $SS$ ) of 0.1% ( $N_{CCN,0.1\%}$ ), (b)  $N_{CCN}$  at  $SS$  of 0.7% ( $N_{CCN,0.7\%}$ ), (c) hygroscopicity factor calculated from monodisperse CCN measurements ( $\kappa_{CCN}$ ) at  $SS$  of 0.1% ( $\kappa_{CCN,0.1\%}$ ), and (d)  $\kappa_{CCN}$  at  $SS$  of 0.7% ( $\kappa_{CCN,0.7\%}$ ). Dots represent the median values. Shaded areas represent the values in the range from 25<sup>th</sup> to 75<sup>th</sup> percent.

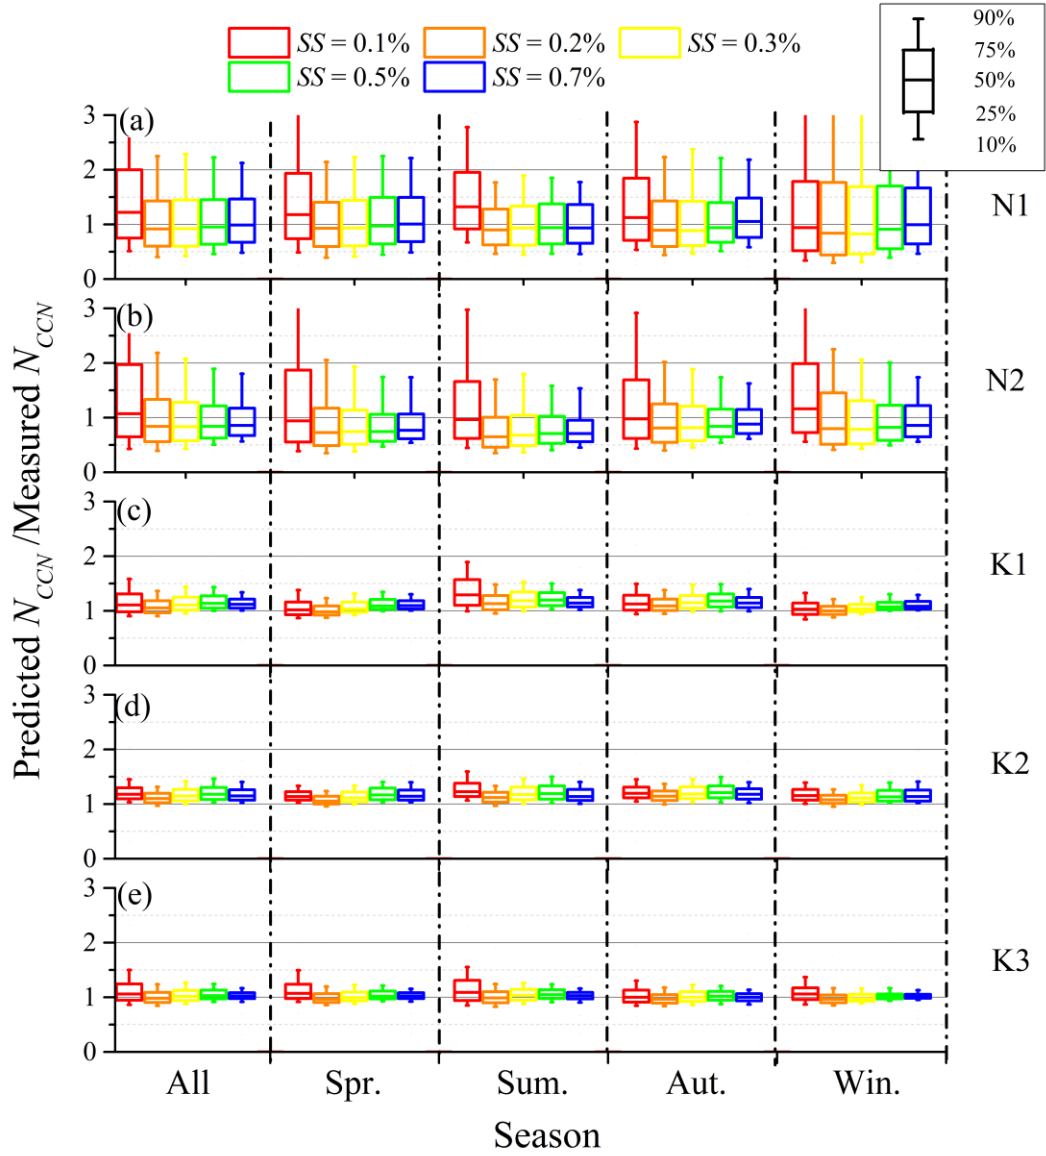

179

180 Figure S8. Statistics of the ratio of predicted CCN number concentration ( $N_{CCN}$ ) to the  
 181 measured one at different supersaturation ( $SS$ ) conditions for each season and all  
 182 datasets. The (a), (b), (c), (d), and (e) represent the prediction results from the N1, N2,  
 183 K1, K2, and K3 scheme, respectively. Introduction for the schemes is in Table 3.



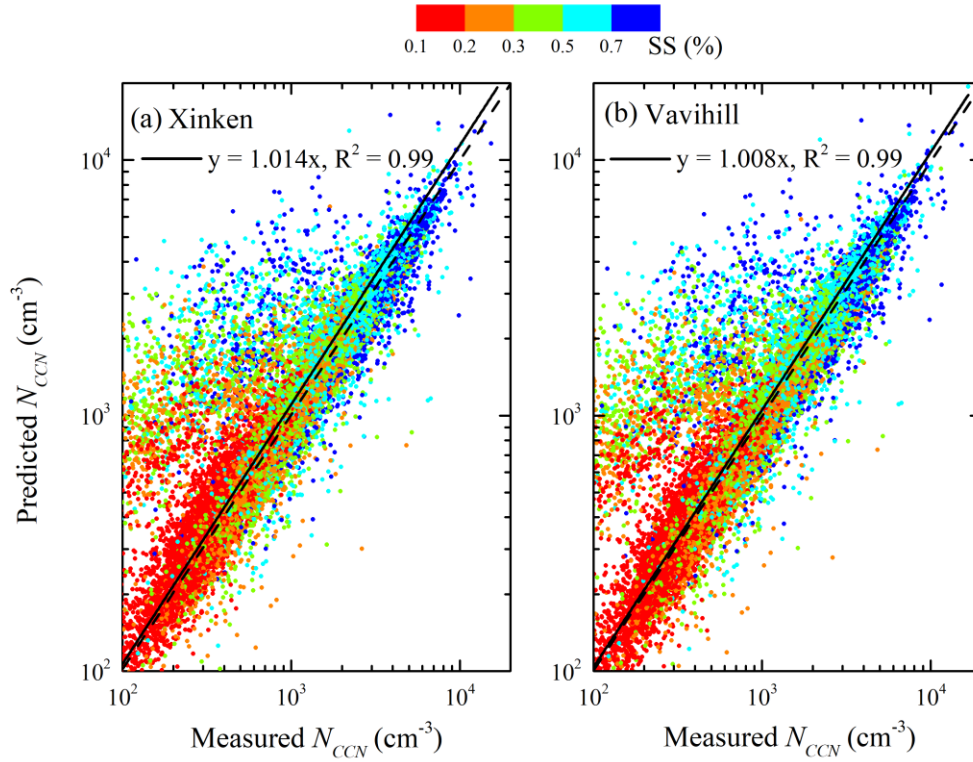

Figure S9. Predicted vs. measured CCN number concentration ( $N_{CCN}$ ) at Melpitz. (a) using the  $\kappa - D_p$  power-law fitting measured at Xinken station in China (Eichler et al., 2008) to predict the Melpitz  $N_{CCN}$ ; (b) using the  $\kappa - D_p$  power-law fitting measured at Vavihill station in Sweden (Fors et al., 2011). Dashed line is the 1:1 line and solid line is the linear fitting.

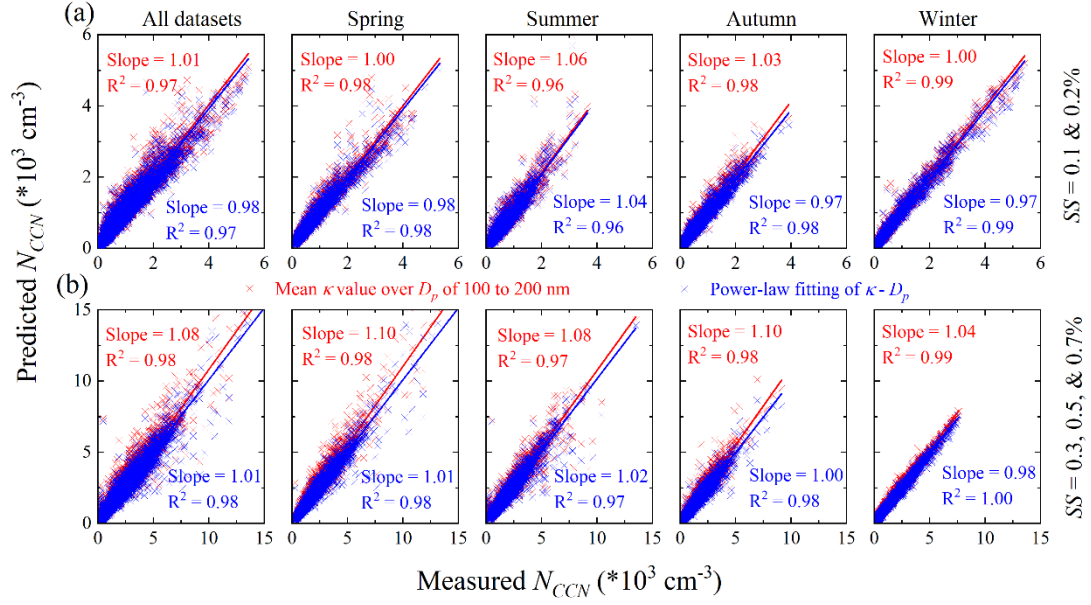

Figure S10. Predicted vs. measured CCN number concentration ( $N_{CCN}$ ) at different supersaturation ( $SS$ ) conditions for different seasons. (a) results at  $SS = 0.1$  and  $0.2\%$ ; (b) results at  $SS = 0.3, 0.5, \text{ and } 0.7\%$ . Red cross represents the predicted  $N_{CCN}$  using mean hygroscopicity factor ( $\kappa$ ) over particle diameter ( $D_p$ ) of 100 to 200 nm, while the blue cross represents the predicted  $N_{CCN}$  using power-law fit of  $\kappa$  and  $D_p$ . Red and blue lines are the linear fits.

Table S1. Summary of CCN number concentration ( $N_{CCN}$ ) at different supersaturation ( $SS$ ) conditions measured at different locations (data for Figure 2).

| Location<br>(coordinates; a.m.s.l)                       | Type                    | Period                        | $SS$ (%)       | Mean<br>$N_{CCN}$ (cm <sup>-3</sup> ) | Reference                 |
|----------------------------------------------------------|-------------------------|-------------------------------|----------------|---------------------------------------|---------------------------|
| Melpitz, Germany<br>(51.5°N, 12.9°E; 86 m)               | rural,<br>continental   | Aug.<br>2012–<br>Oct.<br>2016 | 0.1            | 513                                   | Present<br>study          |
|                                                          |                         |                               | 0.2            | 1102                                  |                           |
|                                                          |                         |                               | 0.3            | 1466                                  |                           |
|                                                          |                         |                               | 0.5            | 2020                                  |                           |
|                                                          |                         |                               | 0.7            | 2477                                  |                           |
| Vavihill, Sweden<br>(56.0°N, 13.2 °E; 172 m)             | rural                   | May<br>2008–Jul<br>2010       | 0.1–<br>1.0    | 362–1795                              | Fors et al.,<br>2011      |
| Southern Great Plains,<br>USA<br>(36.6°N, 97.5°W; 320 m) | rural,<br>agricultural  | Sep.<br>2006–<br>Apr.<br>2011 | 0.4            | 1248                                  | Liu and Li,<br>2014       |
| Hyytiälä, Finland<br>(61.9°N, 24.3°E; 181 m)             | rural                   | Feb.<br>2009–<br>Dec.<br>2012 | 0.1–<br>1.0    | 274–1128                              | Paramonov<br>et al., 2015 |
| Mahabaleshwar, India<br>(17.9°N, 73.7°E;<br>~490 m)      | rural                   | Jun.<br>2015                  | 0.1–<br>0.94   | 118–1826                              | Singla et<br>al., 2017    |
| Guangzhou, China<br>(23.6°N, 113.1°E; ~21 m)             | rural                   | Jul. 2006                     | 0.068–<br>0.67 | 995–<br>10731                         | Rose et al.,<br>2010      |
| Wuqing, China<br>(39.4°N, 117.0°E; 7.4 m)                | suburban                | Dec.<br>2009–<br>Jan. 2010    | 0.056–<br>0.7  | 2192–<br>12963                        | Deng et<br>al., 2011      |
| Seoul, Korea<br>(37.6°N, 127.0°E; ~38 m)                 | urban                   | 2004–<br>2010                 | 0.4–<br>0.8    | 4145–<br>6067                         | Kim et al.,<br>2014       |
| Mahabubnagar, India<br>(17.7°N, 78.9°E; ~490 m)          | polluted<br>continental | Oct.<br>2011                  | 1.0            | ~5400                                 | Varghese<br>et al., 2016  |

Table S2. Error function fits for the relationships between activation ratio (AR) vs. supersaturation (SS), and CCN number concentration ( $N_{CCN}$ ) vs. SS for different seasons. The equation is  $y=a+a*\text{erf}(\ln(x/b)/c)$ , where a, b, and c are parameters remained to be determined. The  $a_{AR}$  and  $a_{NCCN}$  represent the parameter a in AR vs. SS fitting and  $N_{CCN}$  vs. SS fitting, respectively.

| Season | $a_{AR}$ | $a_{NCCN}$ | $b$  | $c$  | $R^2$ |
|--------|----------|------------|------|------|-------|
| Spring | 0.50     | 2637       | 0.72 | 2.33 | 0.998 |
| Summer | 0.51     | 3162       | 1.04 | 2.15 | 0.997 |
| Autumn | 0.56     | 2443       | 0.84 | 2.29 | 0.999 |
| Winter | 0.44     | 1624       | 0.29 | 1.83 | 0.999 |
| All    | 0.40     | 2199       | 0.59 | 2.25 | 0.998 |
